# Supplementary material for: Genome-Scale Analysis Reveals Strain Kdesi as a Distinct Evolutionary Lineage and Extensive Cryptic Diversity in the Genus Bdellovibrio
Source: Research Square preprint supplement (doi:10.21203/rs.3.rs-8476110/v1), 2026-01-09
Supplement: Supplementary file 1 [file 2604677898b58d74921b0eee.docx]

**
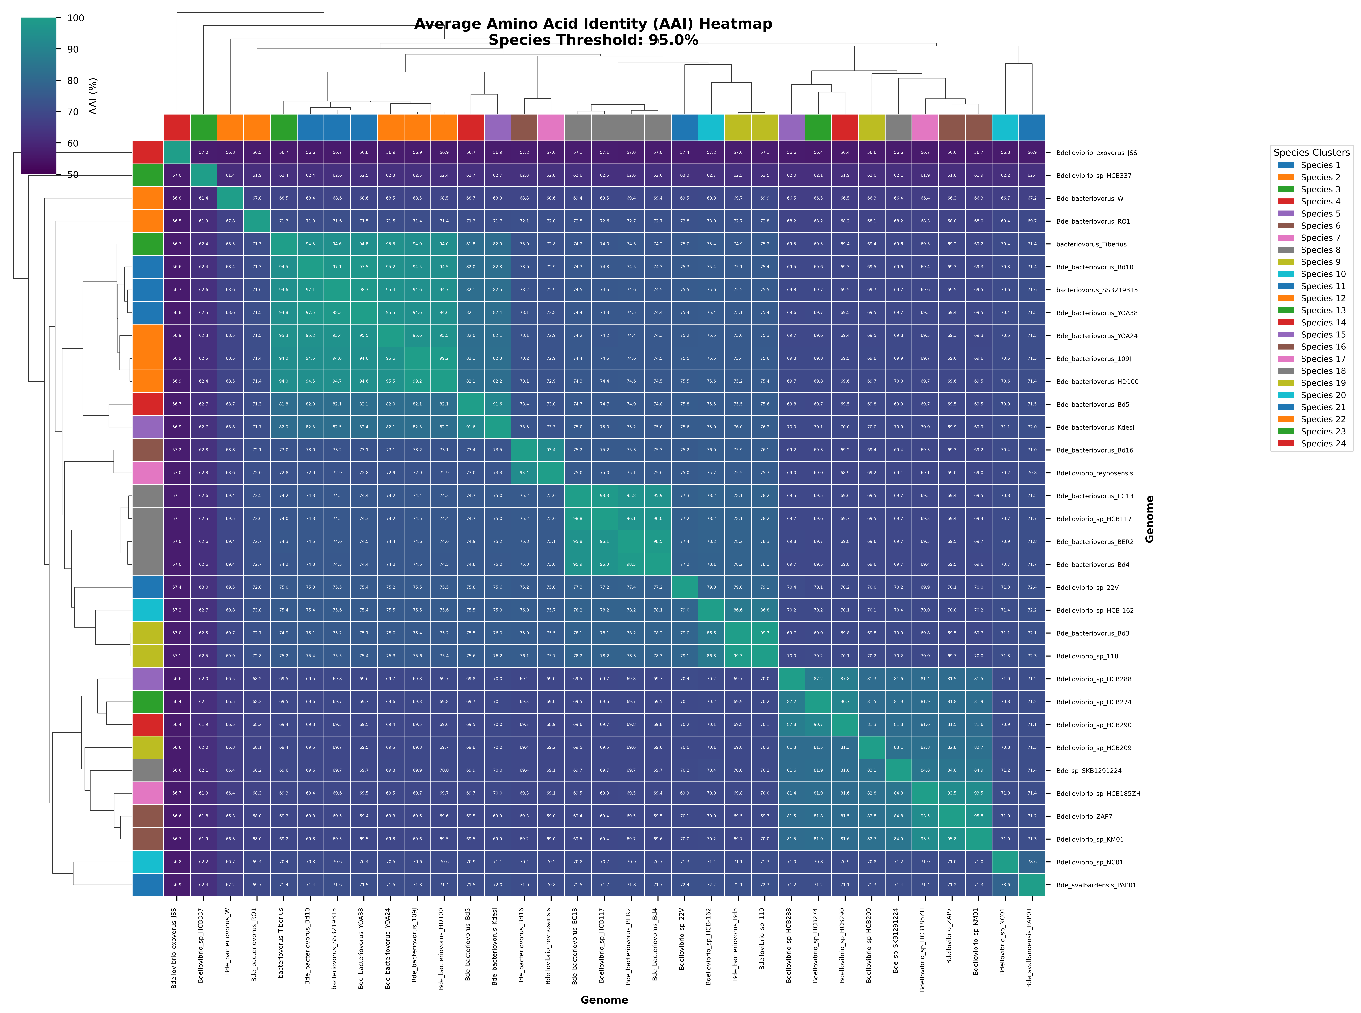
**

**Figure S1.** Pairwise AAI similarity matrix among Bdellovibrio strains.


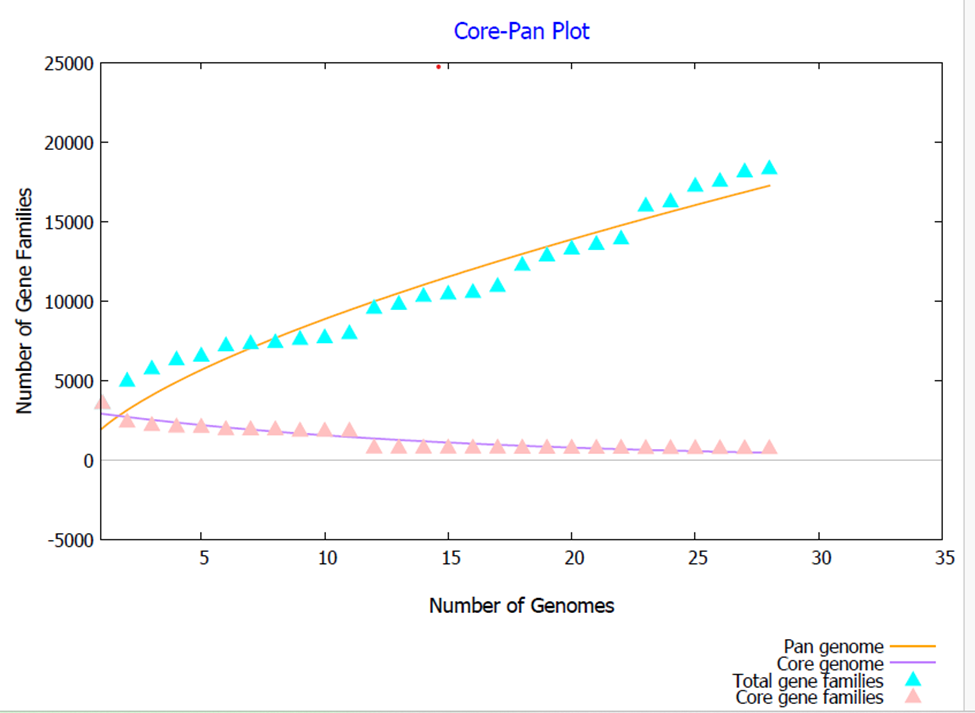


**Figure S2a**: Heaps’ law curve showing open pan-genome structure.


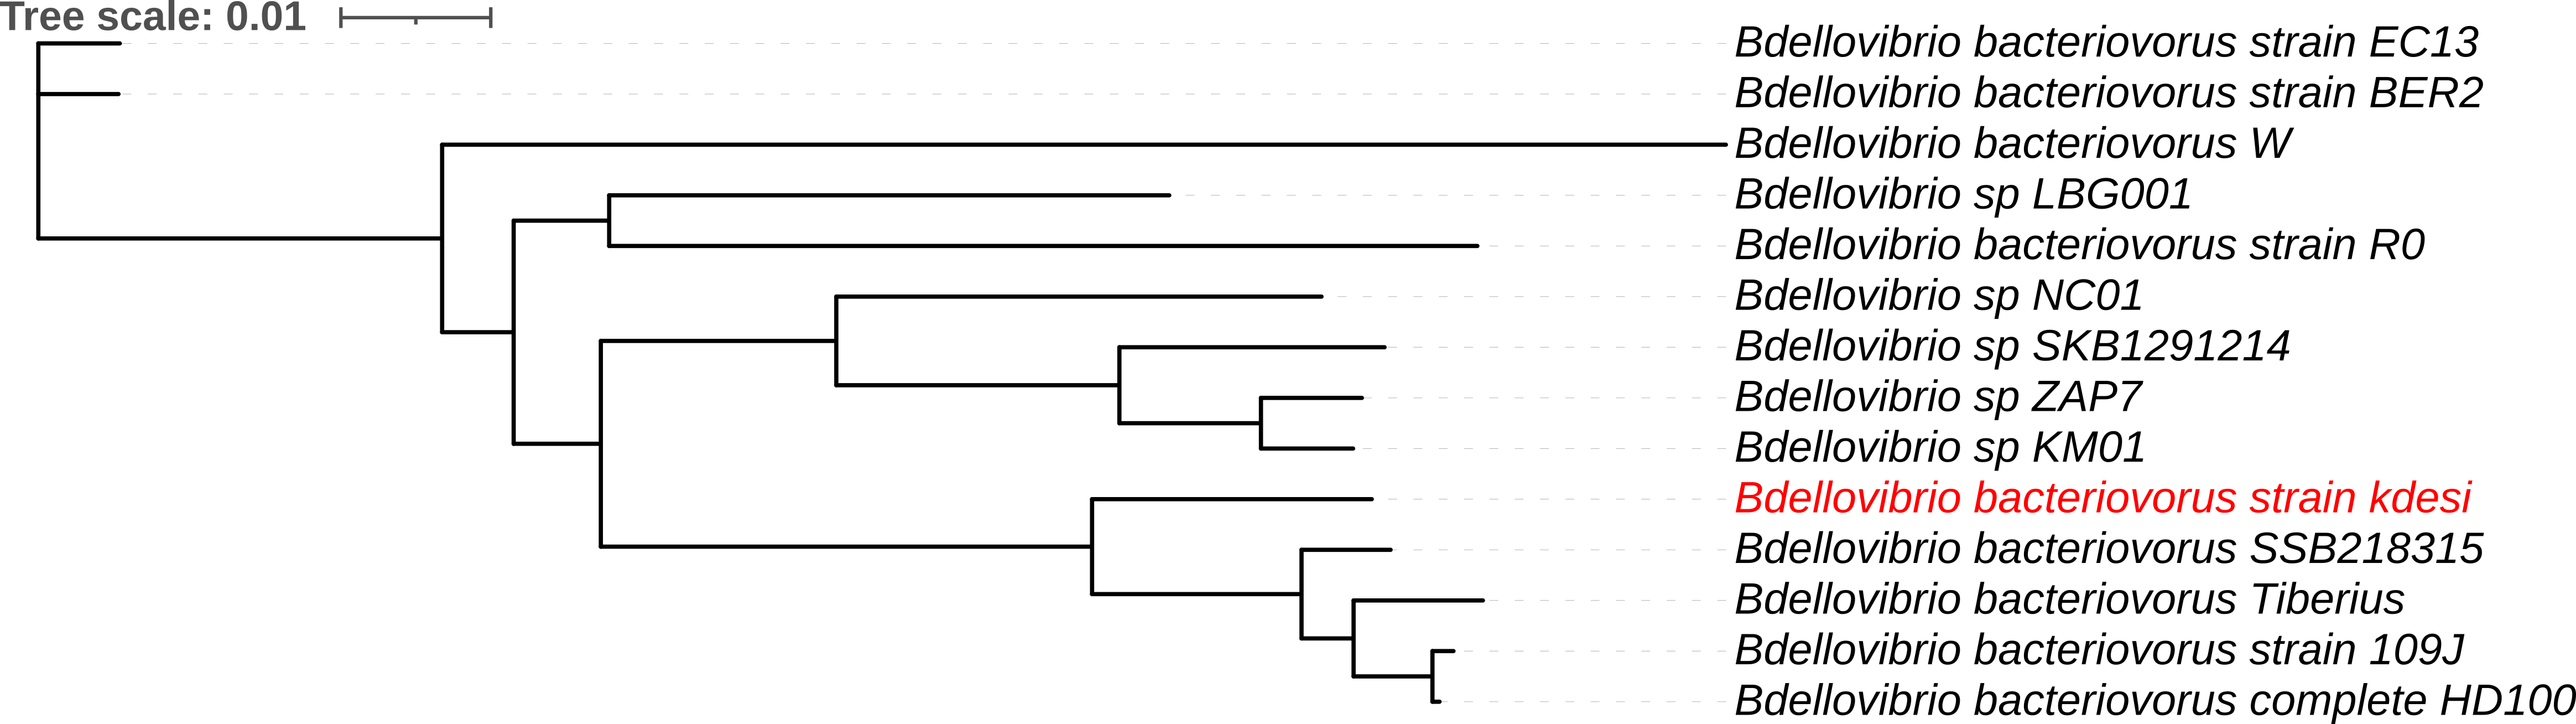


Figure S2b: A phylogeny based on single nucleotide polymorphism; SNP was analyzed, and tree generated with REALPHY, an online complete genome drawing tool. The tree was visualized with iTOL l(https://realphy.unibas.ch/REALPHY/scratch/data_qz7qbh8a/report/)

**Figure S2.** Core-genome SNP (cgSNP) phylogeny and Heaps’ law curve showing open pan-genome structure.


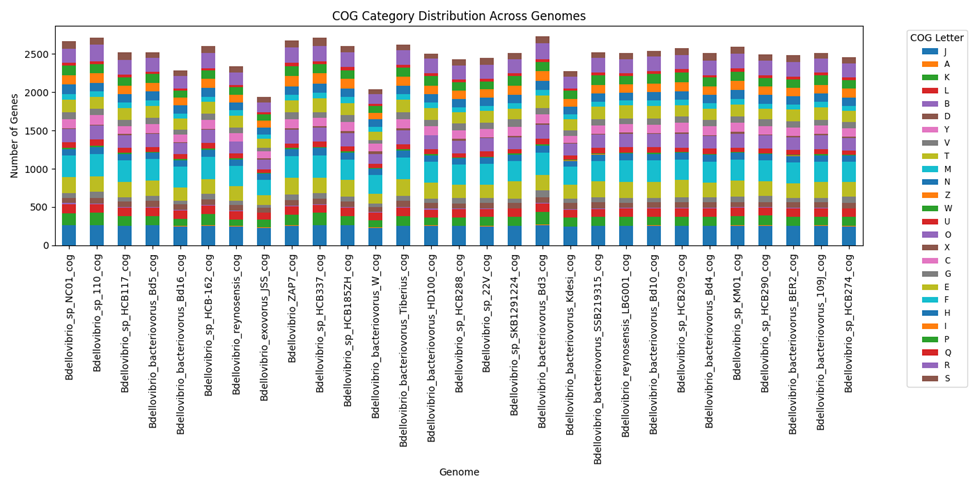


**Figure S3.** COG category distribution and functional annotation of the core genome.


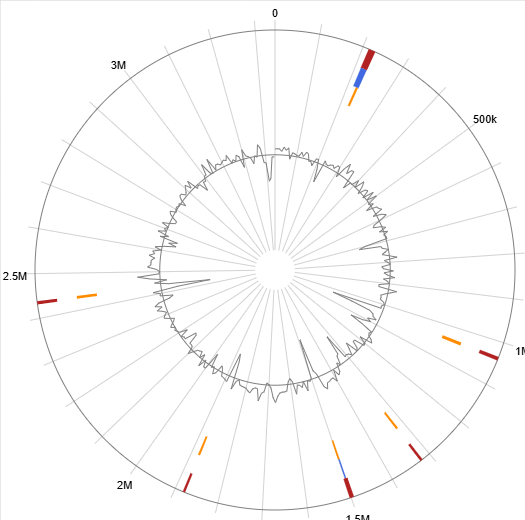


**Figure S4.** Genomic island distribution across Bdellovibrio sp. Kdesi genome.


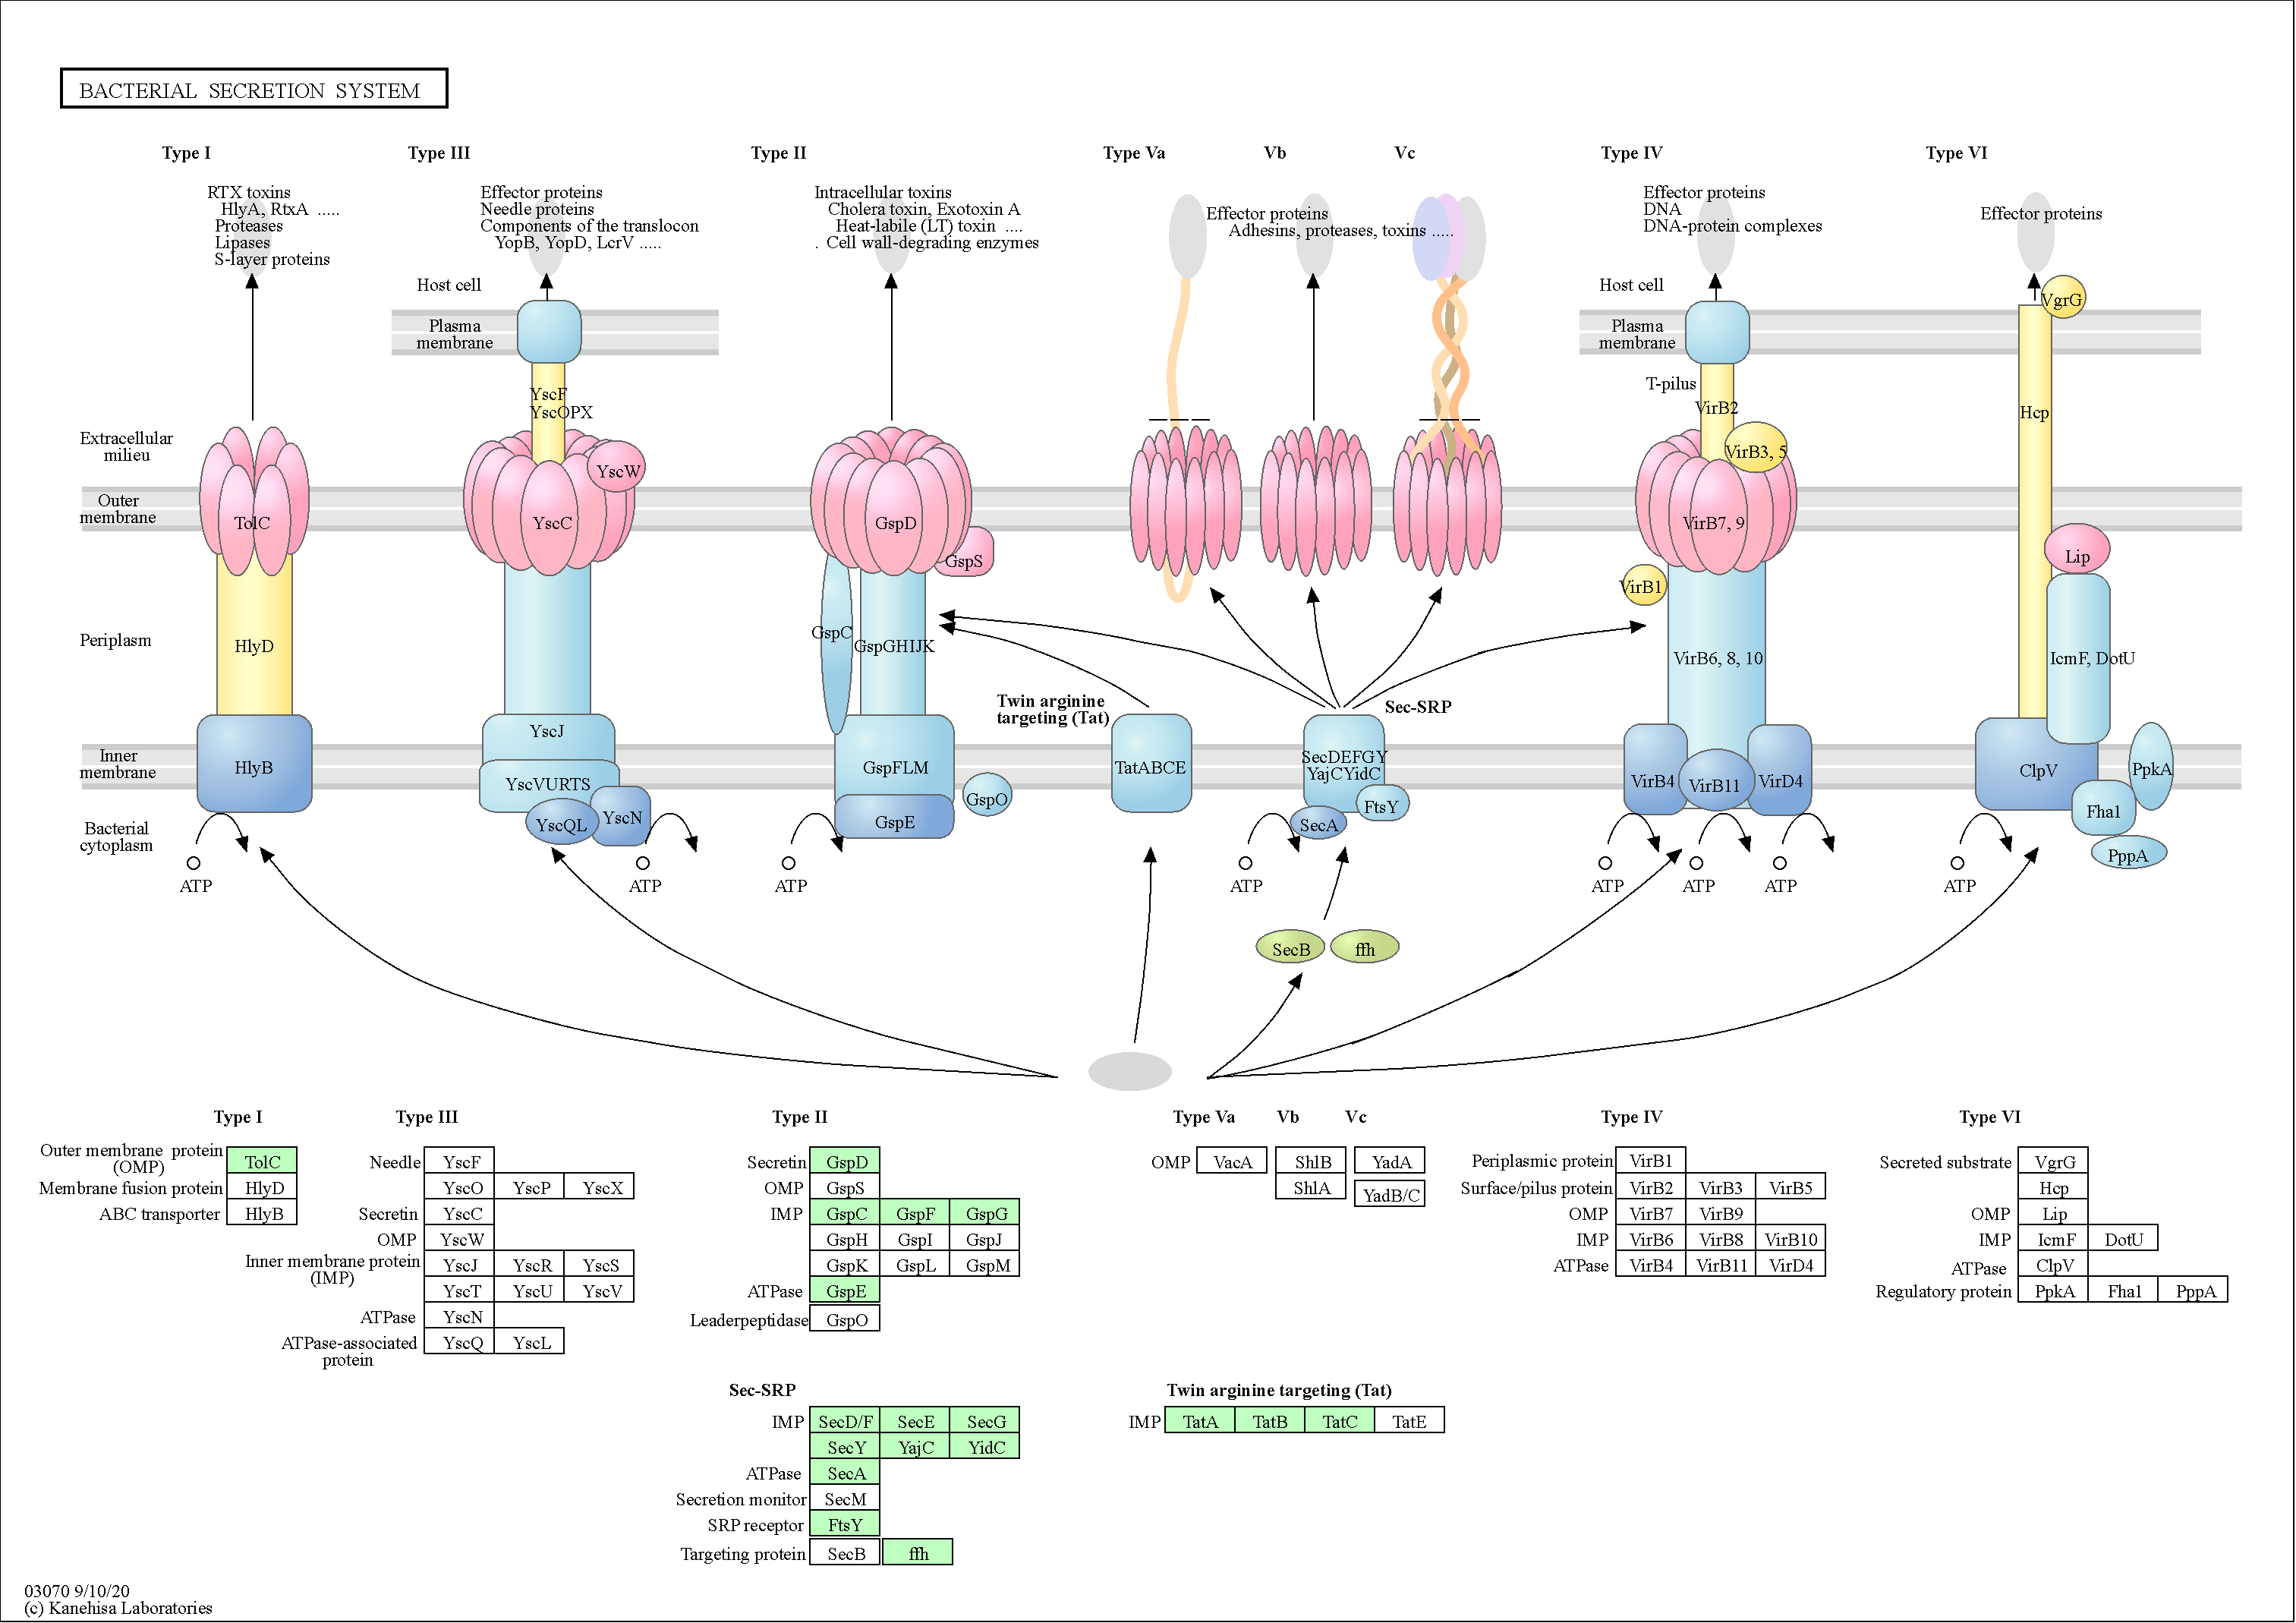


**Figure S5.**  This figure showed the absence of SecB in the Sec secretion system across *Bdellovibrio* strains using the Sec system from *Bdellovibrio* sp kdesi identified with the KEGG GhosttKoala and pathway mapping. Image was generated from KEGG pathway mapping (Kanehisa et al., 2025).


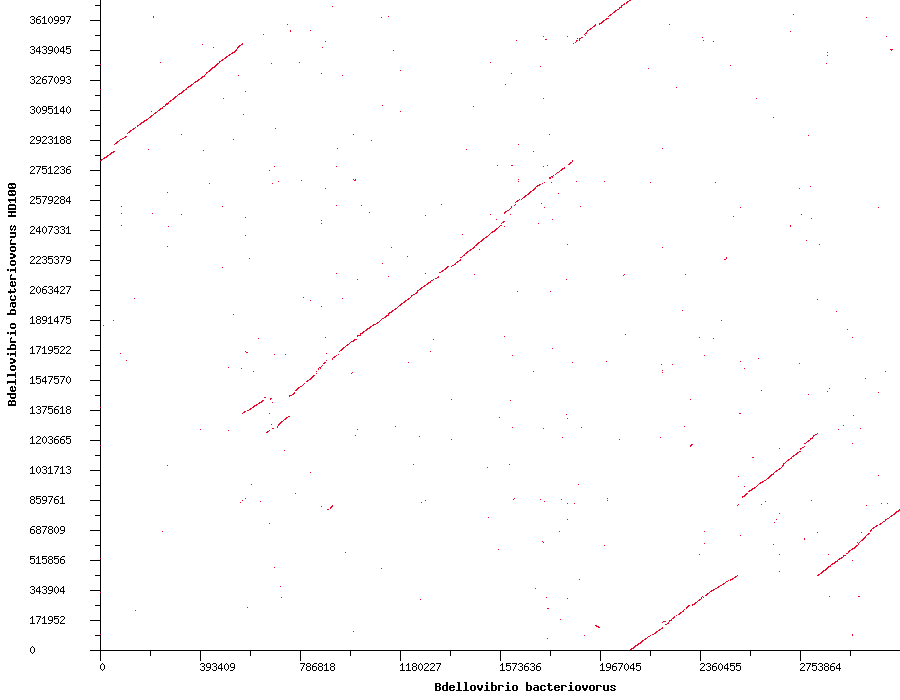


**Kdesi**

**A**

**Figure S6a.** Whole-genome synteny comparison between *Bdellovibrio sp. Kdesi and B. bacteriovorus* HD100.

**
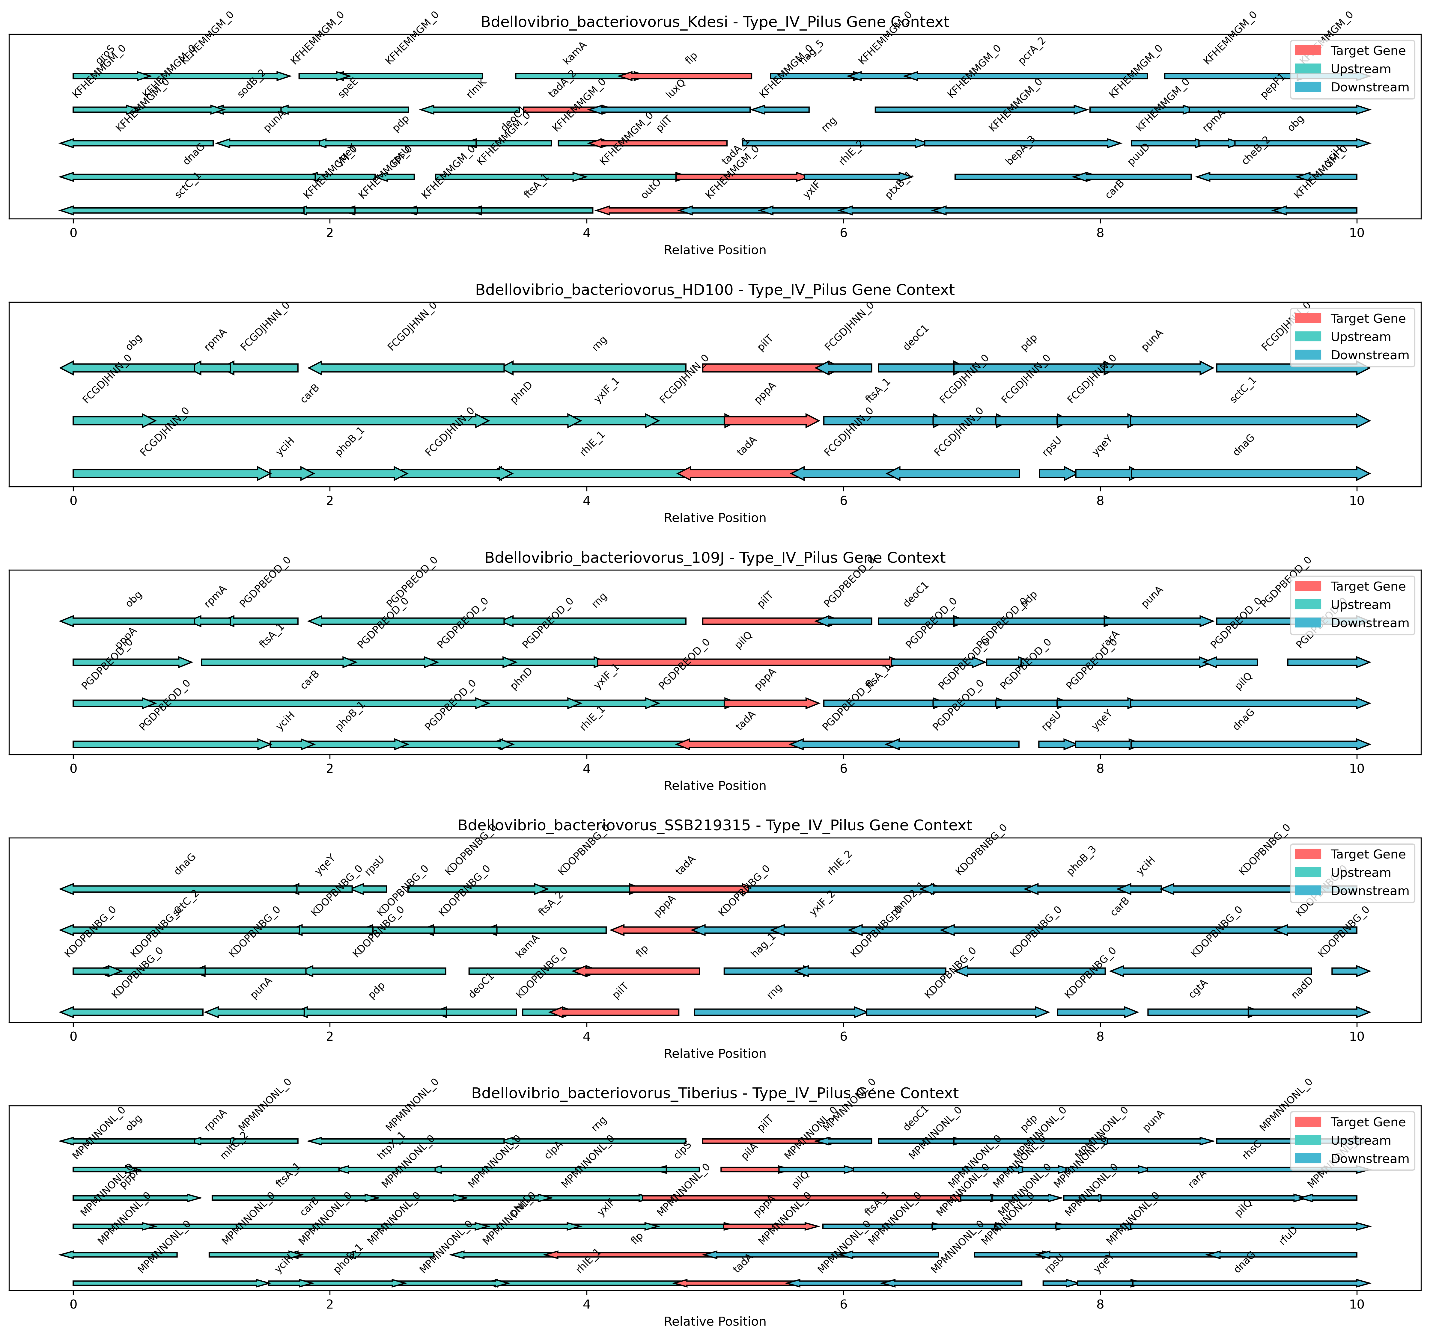
**

**Figure S7.** Synteny of Type IV pilus (T4P) gene cluster across representative Bdellovibrio strains.

**
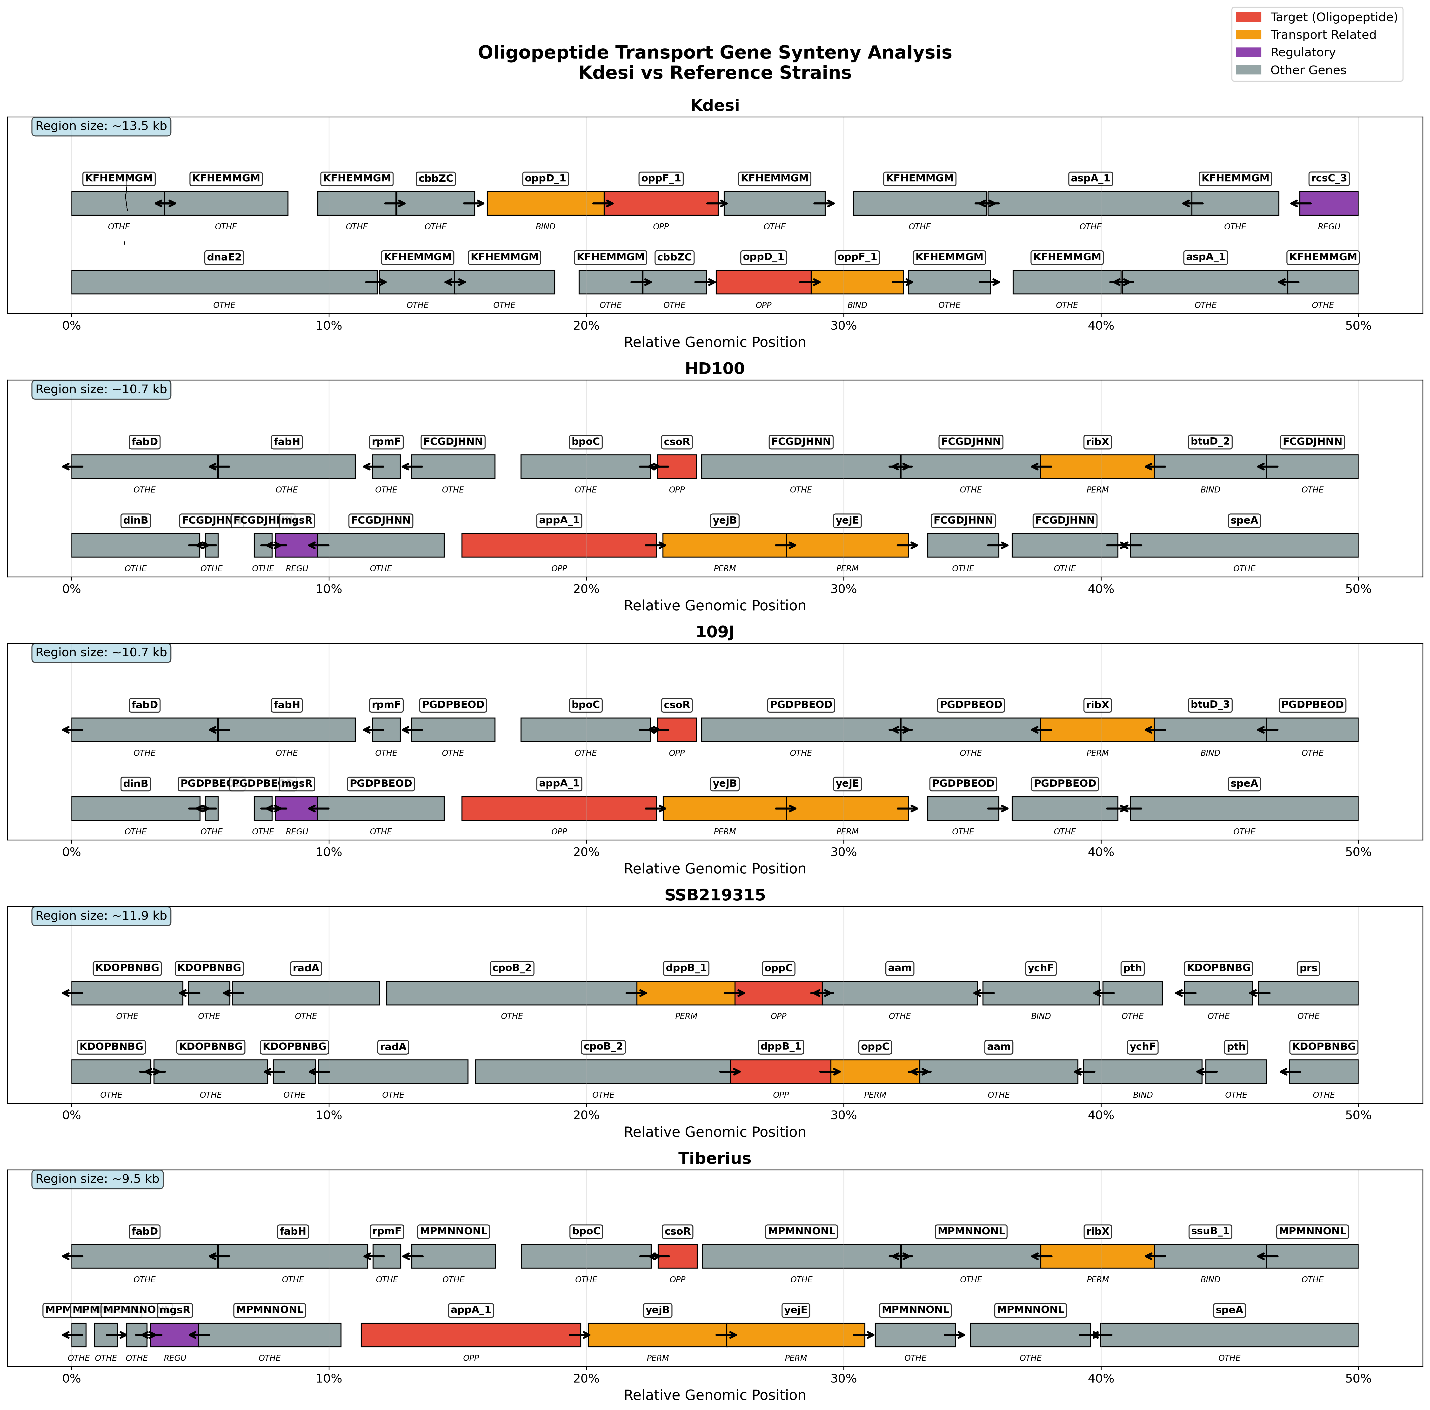
**

Oligopeptide synteny.
